# Supplementary material
Source: publisher site journal article supplement (https://www.dovepress.com/article/279563)
Supplement: Supplementary file 1 [file get_supplementary_file.php]

**
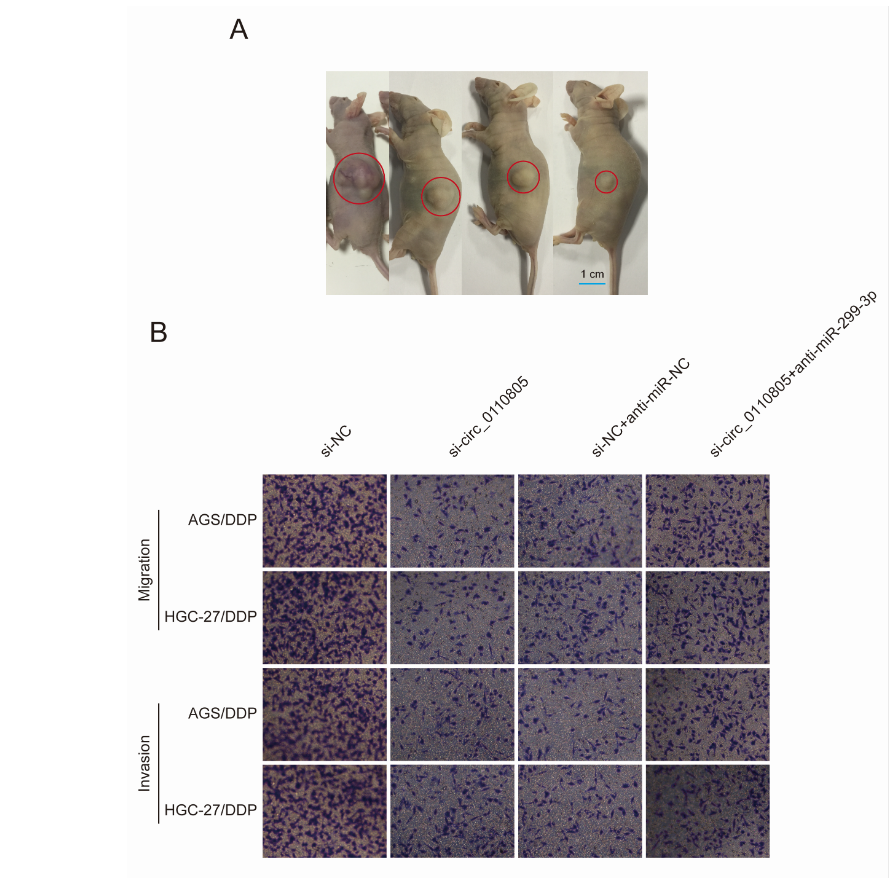
**

**Supplementary Figure 1. The representative images.** (A) The representative image of Figure 3 red circles indicate tumor volume; (B) The representative image of Figure 5F and 5G; Magnification: 200×.
